# Supplementary material for: Chiral tetranuclear copper(ii) complexes: synthesis, optical and magnetic properties
Source: Royal Society of Chemistry journal article supplement (doi:10.1039/d0nj02856h), 2020-01-01
Supplement: d0nj02856h1.pdf [file d0nj02856h1.pdf]

## Chiral Tetranuclear Copper(II) Complexes: Syntheses, Optical and Magnetic Properties

Naushad Ahmed,<sup>a,†</sup> Shalini Tripathi,<sup>a</sup> Arup Sarkar,<sup>a</sup> Kamal Uddin Ansari,<sup>a</sup> Chinmoy Das,<sup>c</sup> Neetu Prajesh,<sup>b</sup> Satoshi Horike,<sup>c, d, e</sup> Ramamoorthy Boomishankar<sup>b\*</sup>, and Maheswaran Shanmugam<sup>a\*</sup>

<sup>a</sup> Department of Chemistry, Indian Institute of Technology Bombay, Powai, Mumbai-400076, Maharashtra, India.

<sup>b</sup> Department of Chemistry, Indian Institute of Science Education and Research (IISER), Pune, Dr. Homi Bhabha Road, Pune- 411008, India

<sup>c</sup> AIST-Kyoto University Chemical Energy Materials Open Innovation Laboratory (ChEM-OIL), National Institute of Advanced Industrial Science and Technology (AIST), Yoshida-Honmachi, Sakyo-ku, Kyoto 606-8501, Japan

<sup>d</sup> Institute for Integrated Cell-Material Sciences, Institute for Advanced Study, Kyoto University, Yoshida-Honmachi, Sakyo-ku, Kyoto 606-8501, Japan

<sup>e</sup> Department of Materials Science and Engineering, School of Molecular Science and Engineering, Vidyasirimedhi Institute of Science and Technology, Rayong 21210, Thailand

<sup>†</sup> Current Address: Tata Institute of Fundamental Research Hyderabad, Gopanpally, Hyderabad-500046, Telangana, India

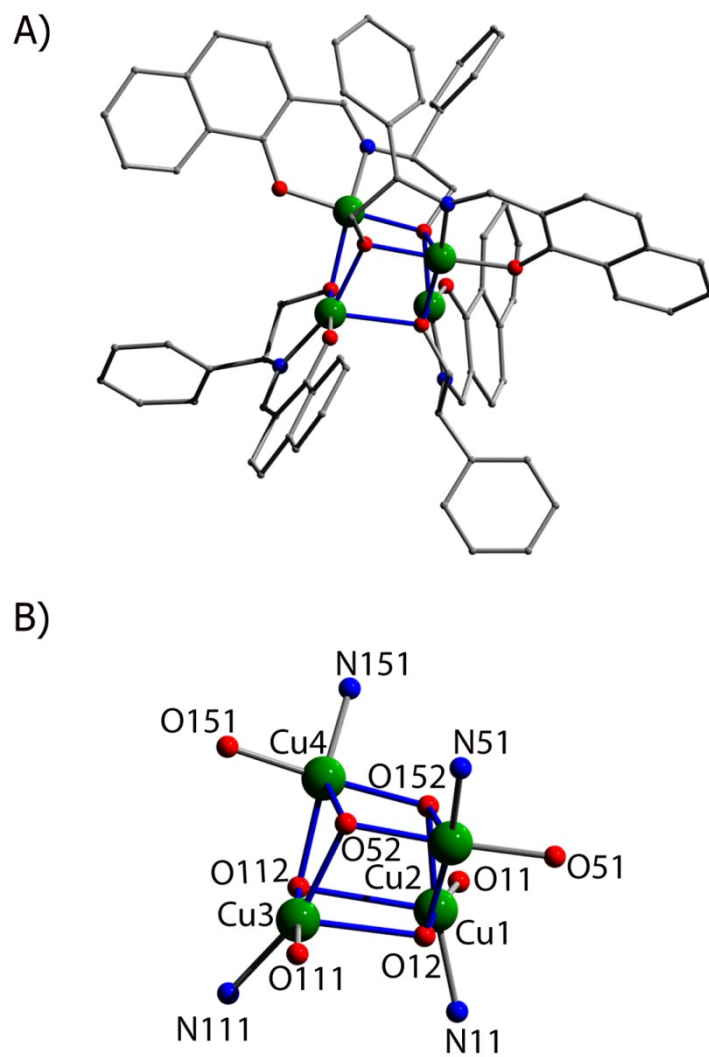

**Figure S1.** A) Ball and stick representation of crystal structure of **S-1**. Hydrogen atoms were removed for clarity B) The metal core found in **S-1**. The same labelling scheme is followed in panel A as in panel B. Colour code: Green = Cu, Red = O, Blue = N, grey = C.

**Table S1.** Crystallographic parameters for complex **S-1**

|                                            |                                |
|--------------------------------------------|--------------------------------|
| Formula                                    | $C_{153}H_{126}N_8O_{20}Cl_2$  |
| Size [mm]                                  | $0.19 \times 0.08 \times 0.05$ |
| System                                     | Monoclinic                     |
| Space group                                | $C2$                           |
| $a$ [Å]                                    | 21.674(6)                      |
| $b$ [Å]                                    | 13.050(4)                      |
| $c$ [Å]                                    | 23.581(6)                      |
| $\alpha$ [°]                               | 90                             |
| $\beta$ [°]                                | 90                             |
| $\gamma$ [°]                               | 90                             |
| $V$ [Å <sup>3</sup> ]                      | 6670(3)                        |
| $Z$                                        | 2                              |
| $\rho_{\text{calcd}}$ [g/cm <sup>3</sup> ] | 1.482                          |
| $2\theta_{\text{max}}$                     | 49.41                          |
| radiation                                  | Mo $K_{\alpha}$                |
| $\lambda$ [Å]                              | 0.7107                         |
| $T$ [K]                                    | 100                            |
| reflns                                     | 24051                          |
| Ind. reflns                                | 9615                           |
| reflns with $I > 2\sigma(I)$               | 4344                           |
| $R1$                                       | 0.0881                         |
| $wR2$                                      | 0.2096                         |

**Table S2.** CShM parameters for the co-ordination geometries of the complexes **R-1**

| Metal Site | Pentagon/PP-<br>$5/D_{3h}$ | Vacant octahedron/vOC-<br>$5/C_{4v}$ | Trigonal bipyramid/TBPY-<br>$5/D_{3h}$ | Square pyramid/SPY-<br>$5/C_{4v}$ | Johnson trigonal bipyramid (J12)/ JTBPY- $5/D_{3h}$ |
|------------|----------------------------|--------------------------------------|----------------------------------------|-----------------------------------|-----------------------------------------------------|
| Cu1        | 20.869                     | 5.276                                | 9.380                                  | 4.369                             | 12.448                                              |
| Cu2        | 24.470                     | 3.733                                | 5.692                                  | 3.506                             | 8.737                                               |
| Cu3        | 25.352                     | 6.218                                | 4.442                                  | 5.481                             | 7.698                                               |
| Cu4        | 23.812                     | 3.602                                | 6.028                                  | 3.324                             | 9.243                                               |

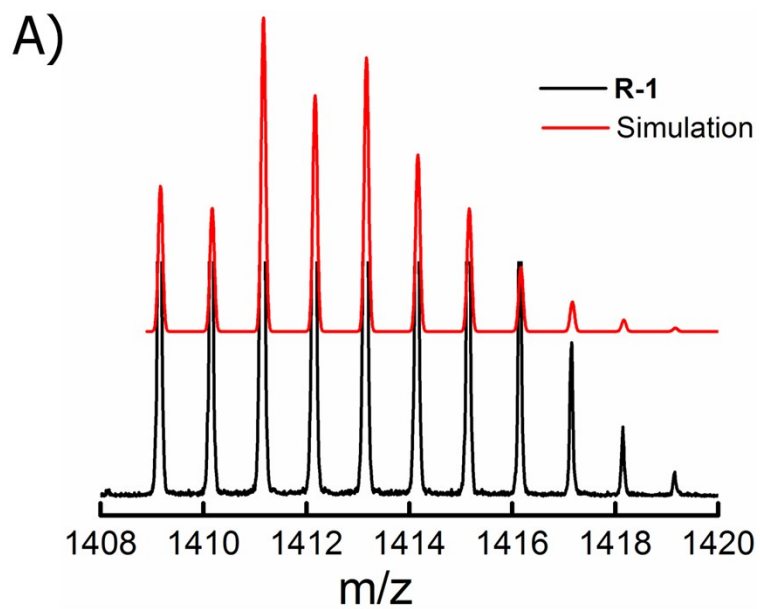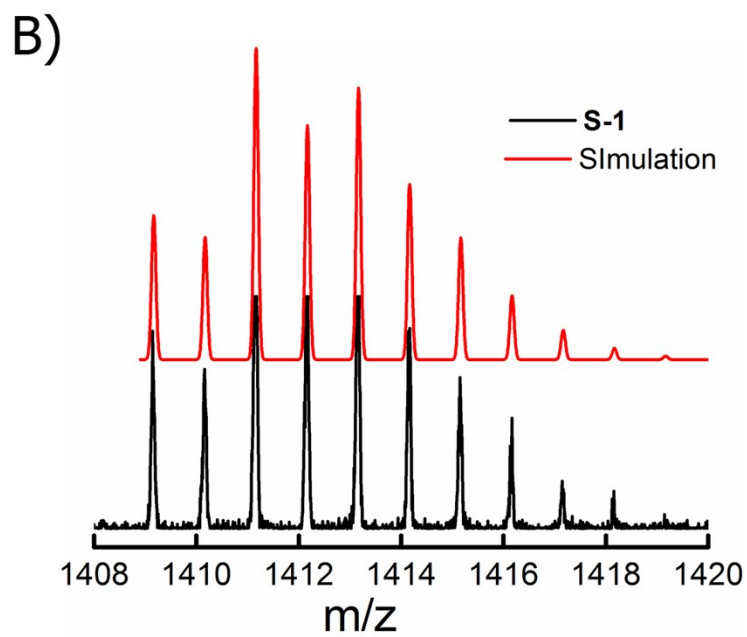

**Figure S2.** ESI-MS spectrum of **R-1** and **S-1** recorded in DMF solution (black trace) and the simulation of its isotopic distribution pattern (red trace).

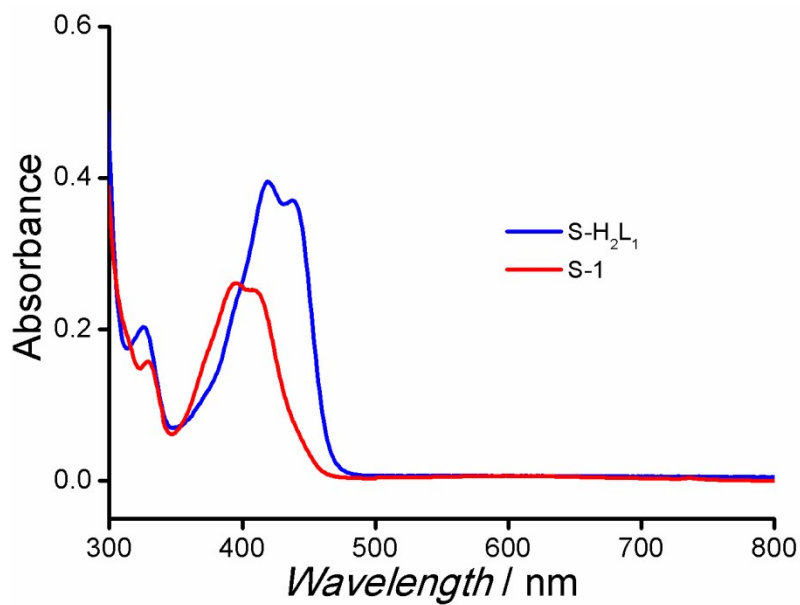

**Figure S3.** Electronic spectra recorded for  $2 \times 10^{-5}$  M and  $1 \times 10^{-4}$  M concentrated solutions of ligand  $S-H_2L_1$  and complex  $S-1$  in the DMF solvent respectively.

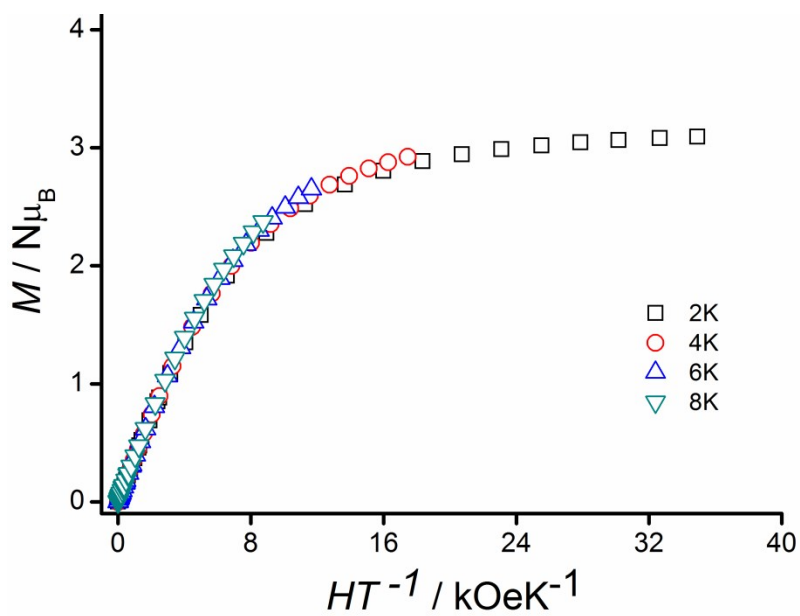

**Figure S4.** Reduced magnetization curves for  $R-1$ .

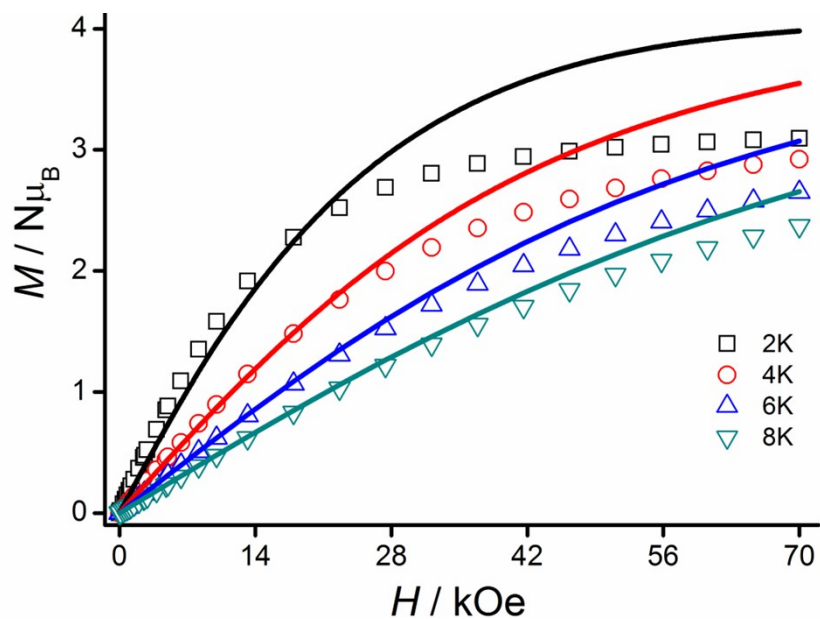

**Figure S5.** Result of simultaneous PHI fitting of magnetization data for **R-1**.

**Table S3:** Possible high spin and broken symmetry solutions performed on the R-1 complex along with their  $S^2$  values.

| Spin state | Cu1 | Cu2 | Cu3 | Cu4 | $\langle S^2 \rangle$ |
|------------|-----|-----|-----|-----|-----------------------|
| HS         | ↑   | ↑   | ↑   | ↑   | 6.011                 |
| BS1        | ↑   | ↓   | ↑   | ↑   | 3.008                 |
| BS2        | ↑   | ↑   | ↓   | ↑   | 3.009                 |
| BS3        | ↑   | ↑   | ↑   | ↓   | 3.002                 |
| BS4        | ↓   | ↓   | ↑   | ↑   | 2.001                 |
| BS5        | ↑   | ↓   | ↓   | ↑   | 2.009                 |

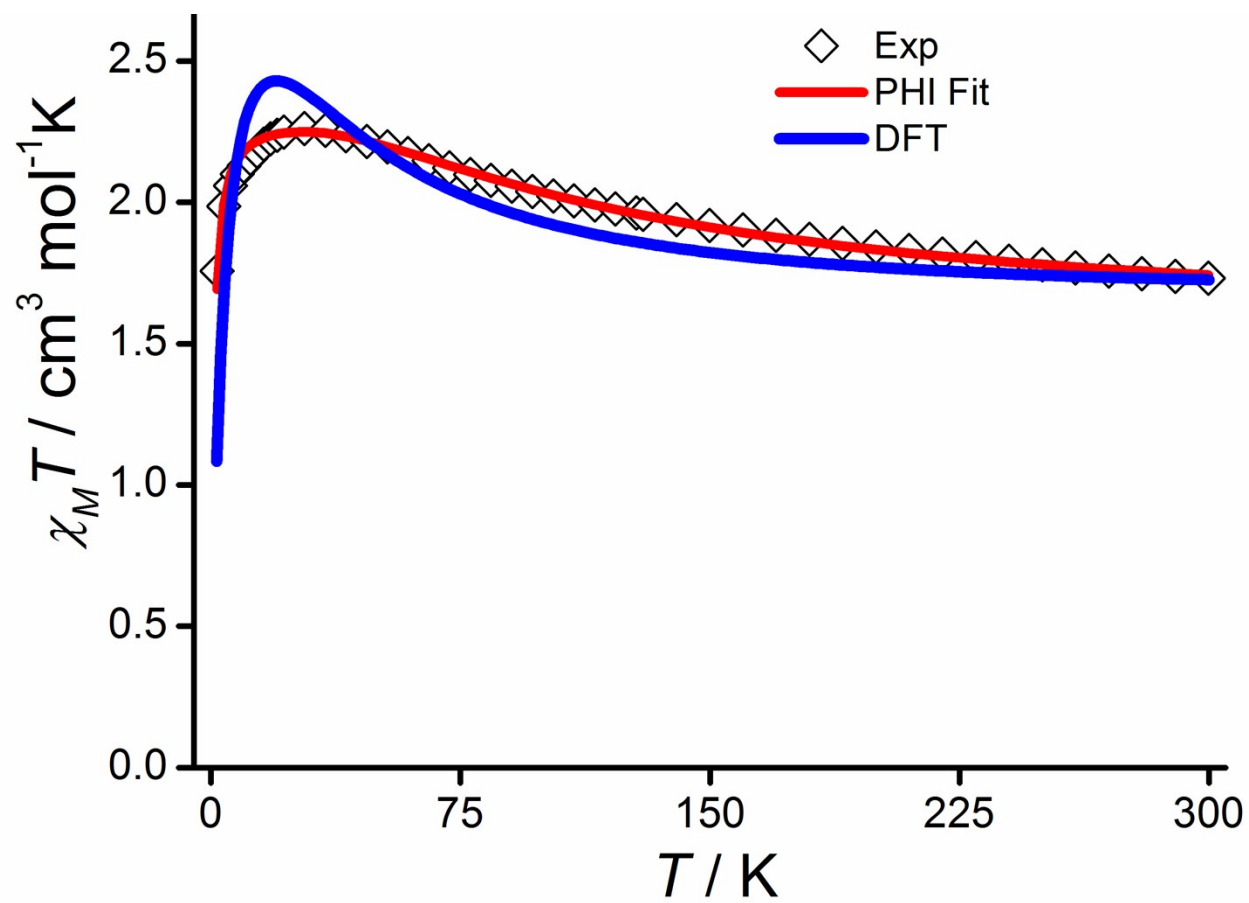

**Figure S6.** Simulation of magnetic susceptibility with DFT computed parameters for R-1.

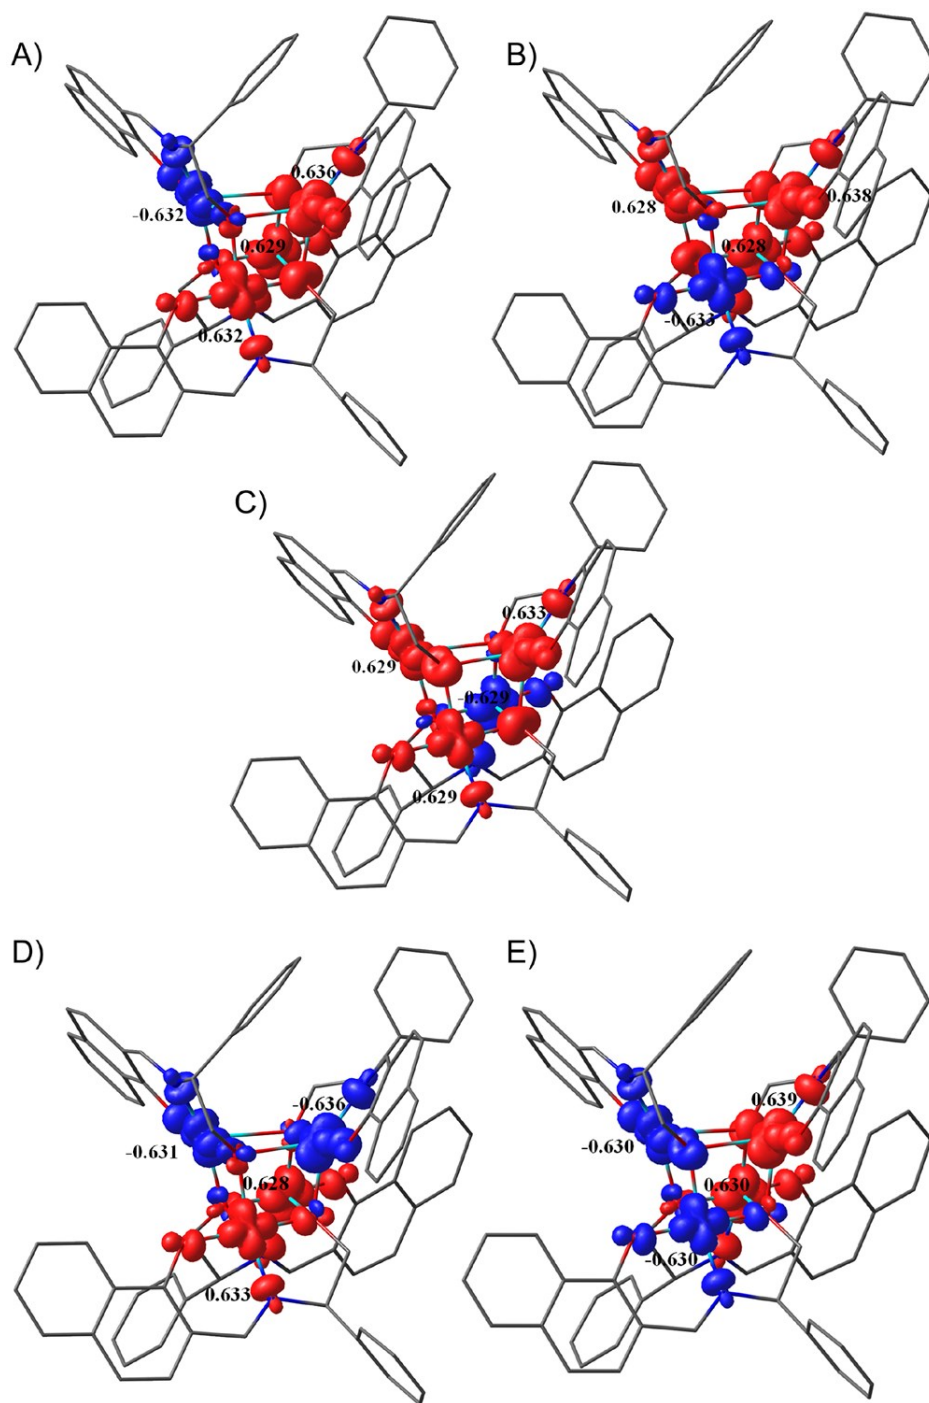

**Figure S7.** B3LYP/TZV computed spin density plots of Cu<sub>4</sub>-cubane at different broken symmetry states (BS1-BS5) A-E respectively with an iso-surface value of 0.009 e/bohr<sup>3</sup>.



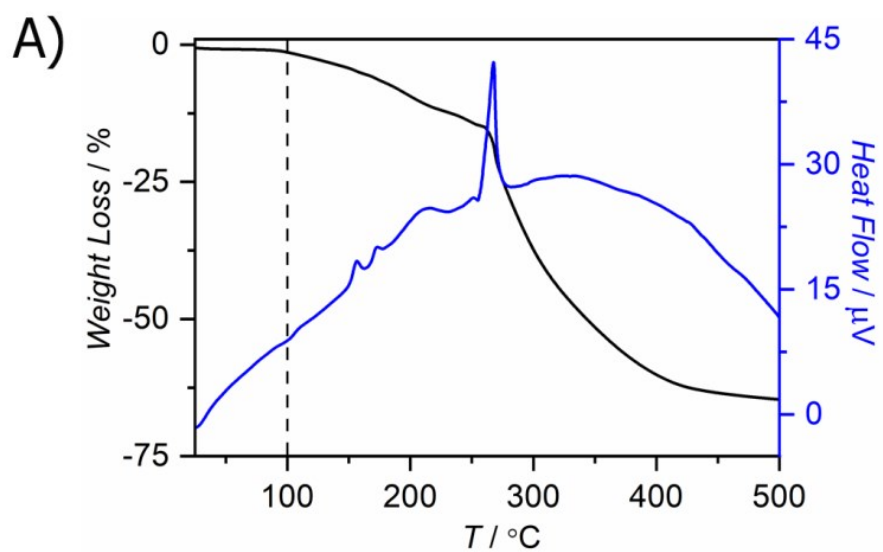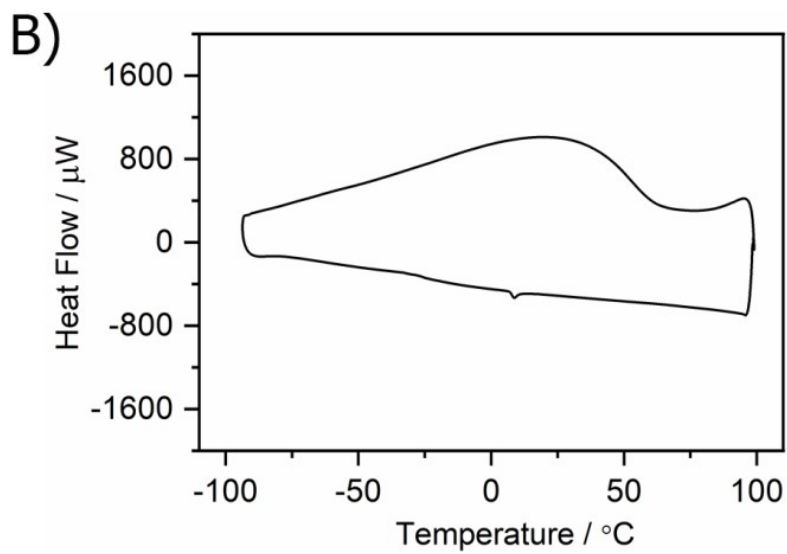

Figure S8. (A) TGA-DTA and (B) DSC data for **R-1**

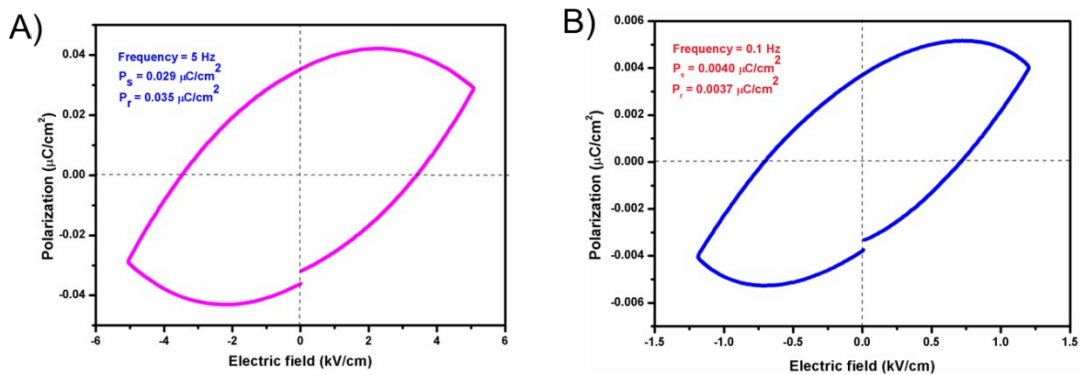

**Figure S9.** Ferroelectric measurement on sample of complex **R-1**. (A) for single crystal and (B) for powder.

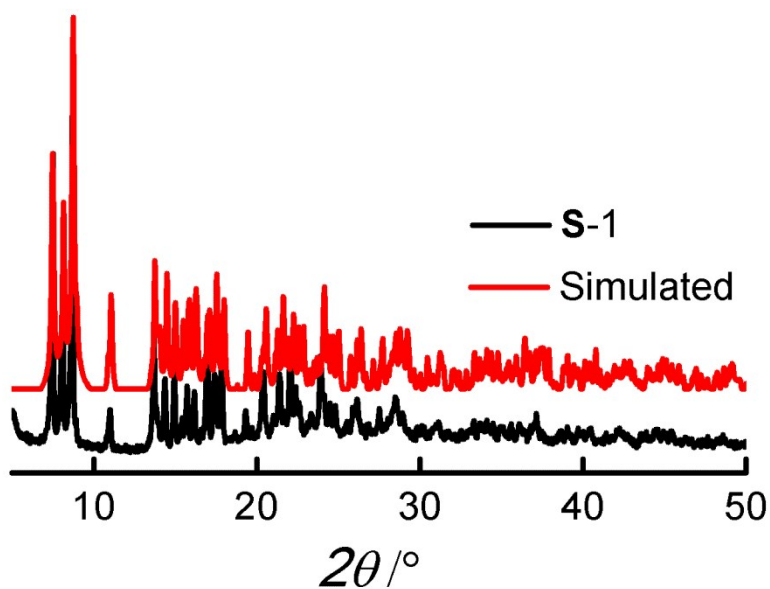

**Figure S10.** Comparison of PXRD profile of complex **S-1** (black trace) with its corresponding PXRD simulated for the crystal structure of **S-1** (red trace).
